# Supplementary material for: Ursodeoxycholic Acid Binds PERK and Ameliorates Neurite Atrophy in a Cellular Model of GM2 Gangliosidosis
Source: Int J Mol Sci. 2023 Apr 13;24(8):7209. doi: 10.3390/ijms24087209 (PMC10138647; doi:10.3390/ijms24087209)
Supplement: Supplementary file 1 [file ijms-24-07209-s001.zip › ijms-2259526-supplementary.pdf]

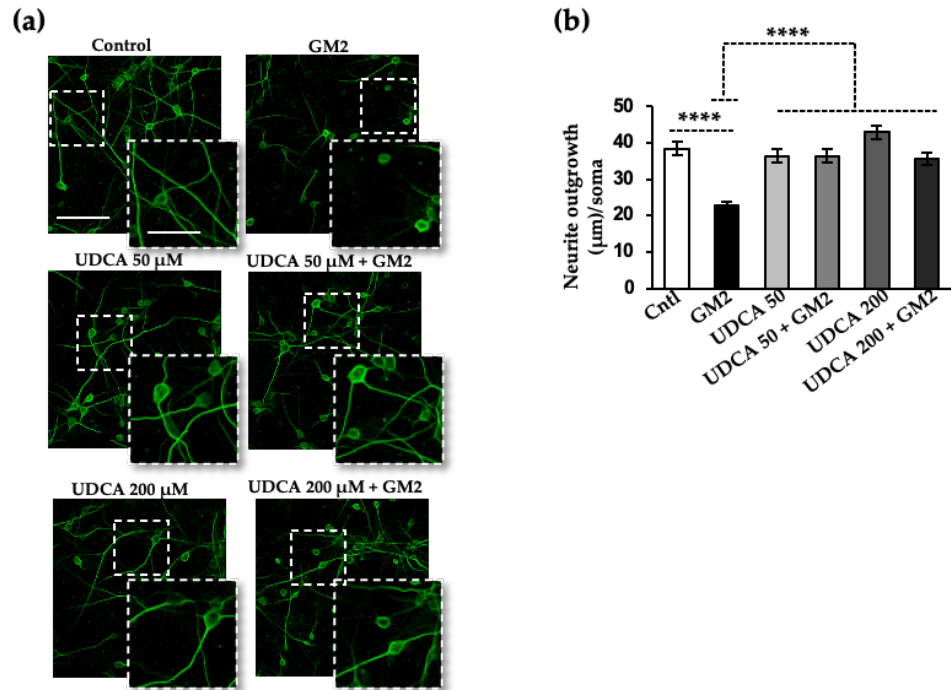

**Figure S1:** Pre-incubation of cells with UDCA reduces neuritic atrophy induced by GM2 accumulation. **(a)** Primary cortical neurons (10 DIV) were treated either with the vehicle, 50  $\mu$ M or 200  $\mu$ M of UDCA for 1 h, and then with or without 2  $\mu$ M of GM2 for 19 h. The cells were fixed with 4% paraformaldehyde, immunolabeled with anti-MAP2 antibody, and visualized with Alexa Fluor-488 conjugated secondary antibody. Images were recorded with a confocal microscope. Scale bars: 100  $\mu$ m (regular images), 50  $\mu$ m (magnified images). **(b)** Histogram (mean  $\pm$  SEM) represents neurite outgrowth with respect to total cells, analyzed with Image J plug-ins (NIH, USA).

\*\*\*\*,  $p \leq 0.00001$  with respect to the control as determined by one-way ANOVA,  $n=3$ .

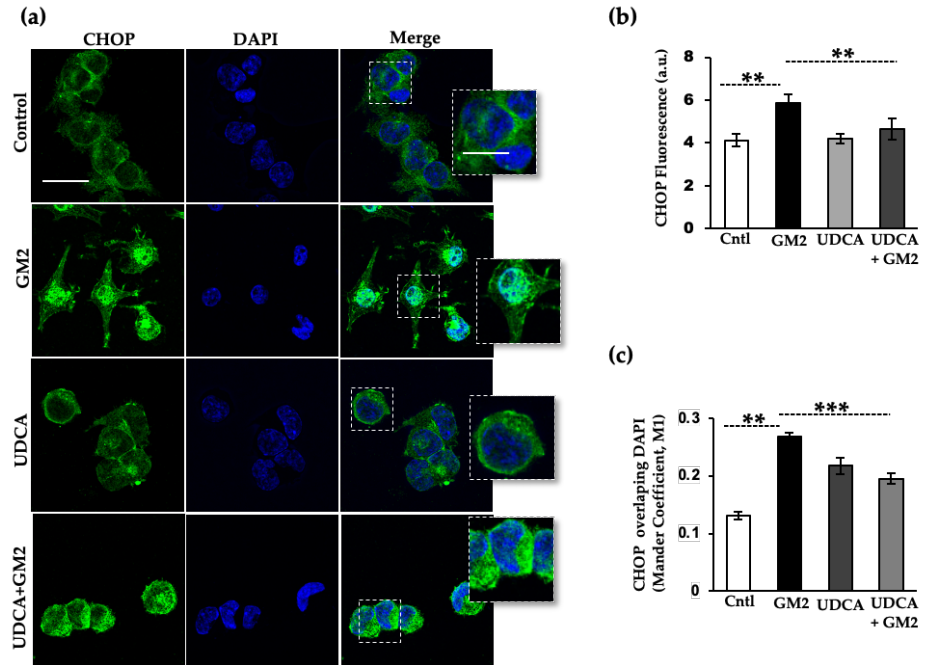

**Figure S2:** UDCA reduces CHOP levels and its translocation to the nuclei in GM2-stressed cells. (a) N2a cells were treated with 1000  $\mu$ M of UDCA and incubated with or without exogenous GM2 (2  $\mu$ M). Then, they were fixed, immunolabeled with anti-CHOP antibody, and visualized with Alexa Fluor-488 conjugated secondary antibody (green). Nuclei were labeled with DAPI (blue). Scale bars: 30  $\mu$ m (regular images), 15  $\mu$ m (magnified images). Images were obtained with a confocal microscope (Zeiss LSM 800). (b) Histograms (mean  $\pm$  SEM) represent green fluorescence intensity values,  $n=3$ . (c) Manders' overlap coefficient, M1 was calculated (Channel 1: green, Channel 2: blue). Histograms (mean  $\pm$  SEM) represent M1 values,  $n=3$ . (b) and (c) \*\*  $p \leq 0.001$  and \*\*\*  $p \leq 0.0001$  as determined by one-way ANOVA,  $n=3$
